# Supplementary material for: Bismuth-Rich Co/Ni Bimetallic Metal–Organic Frameworks as Photocatalysts toward Efficient Removal of Organic Contaminants under Environmental Conditions
Source: MDPI journal article supplement (doi:10.3390/mi14050899), 2023-04-22
Supplement: s1 [file s1]

## Supporting Information

### **Bismuth-Rich Co/Ni Bimetallic Metal–Organic Frameworks as Photocatalysts toward Efficient Removal of Organic Contaminants under Environmental Conditions**

Ayesha Siddiqi 1, Toheed Akhter 1,\*, Muhammad Faheem 1, Shumaila Razzaque 1, Asif Mahmood 2, Waheed Al-Masry 2, Sohail Nadeem 1, Sadaf Ul Hassan 3, Hyunseung Yang 4 and Chan Ho Park 5,\*

1 Department of Chemistry, School of Science, University of Management and Technology, C-II, Johar Town, Lahore 54770, Pakistan

2 Department of Chemical Engineering, College of Engineering, King Saud University, Riyadh 11451, Saudi Arabia

3 Department of Chemistry, COMSATS University Islamabad, Lahore Campus, Lahore 54000, Pakistan

4 Electronic Convergence Materials & Device Research Center, Korea Electronics Technology Institute, Seongnam-si 13509, Republic of Korea; hsyang@keti.re.kr

5 Department of Chemical and Biological Engineering, Gachon University, 1342 Seongnam-daero

\* Correspondence: toheed.akhter@umt.edu.pk (T.A.); chhopark@gachon.ac.kr (C.H.P.)

**Table S1:** Calculations of crystallite size of Co/Ni-MOF and Co/Ni-MOF@BiOI composite using Scherer's equation.

| Co/Ni-MOF                   |               |                       | Co/Ni-MOF@BiOI              |               |                       |
|-----------------------------|---------------|-----------------------|-----------------------------|---------------|-----------------------|
| Peak Position (2 $\theta$ ) | FWHM (degree) | Crystallite size (nm) | Peak Position (2 $\theta$ ) | FWHM (degree) | Crystallite size (nm) |
| 11.85026                    | 0.25406       | 31.43729138           | 26.11503                    | 0.69764       | 11.09294              |
| 16.78405                    | 0.36811       | 21.81487026           | 32.76448                    | 0.38302       | 19.89912              |
| 21.77479                    | 0.23122       | 34.98791176           | 33.32814                    | 1.59936       | 4.758559              |
| 25.81226                    | 0.2611        | 31.21480144           | 47.04654                    | 0.61856       | 11.7759               |
| 28.2985                     | 42.15449      | 0.194352757           | 54.71319                    | 1.31534       | 5.364263              |
| Average crystallite size    | -             | 23.93 nm              | Average crystallite size    | -             | 10.58 nm              |

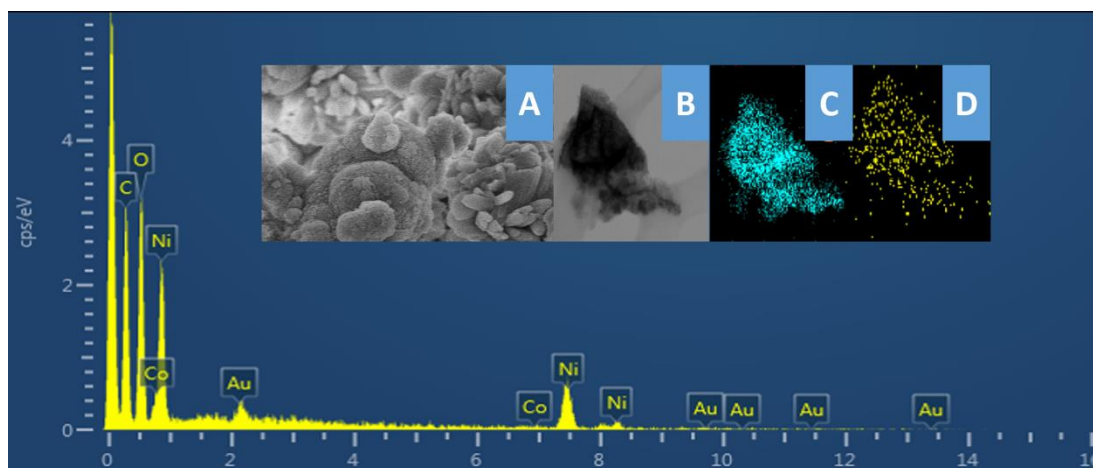

**Figure S1.** EDX spectrum of Co/Ni-MOF, (A) SEM of Co/Ni-MOF (500 nm resolution), (b) HR-TEM of Co/Ni-MOF, (C) Ni and (D) Co element maps in HR-TEM image.

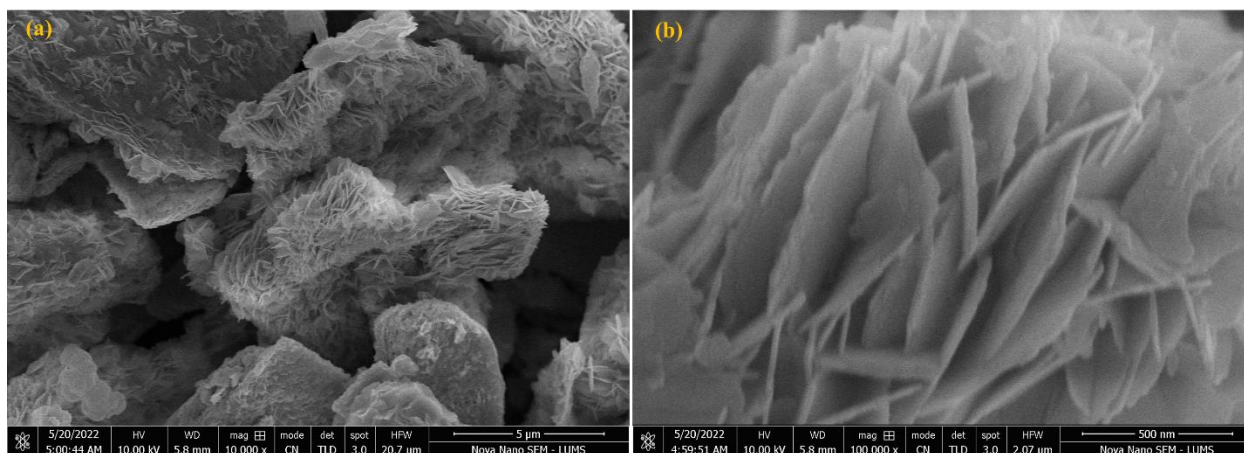

**Figure S2** SEM micrographs of BiOI.

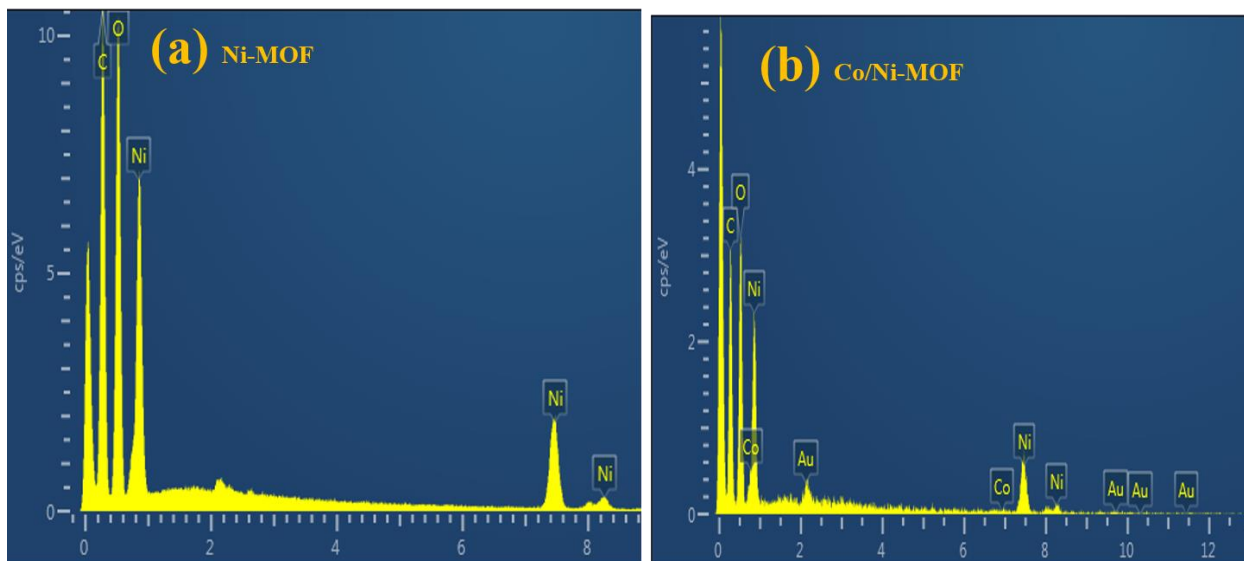

**Figure S3** EDX spectra of (a) Ni-MOF, (b) Co/Ni-MOF

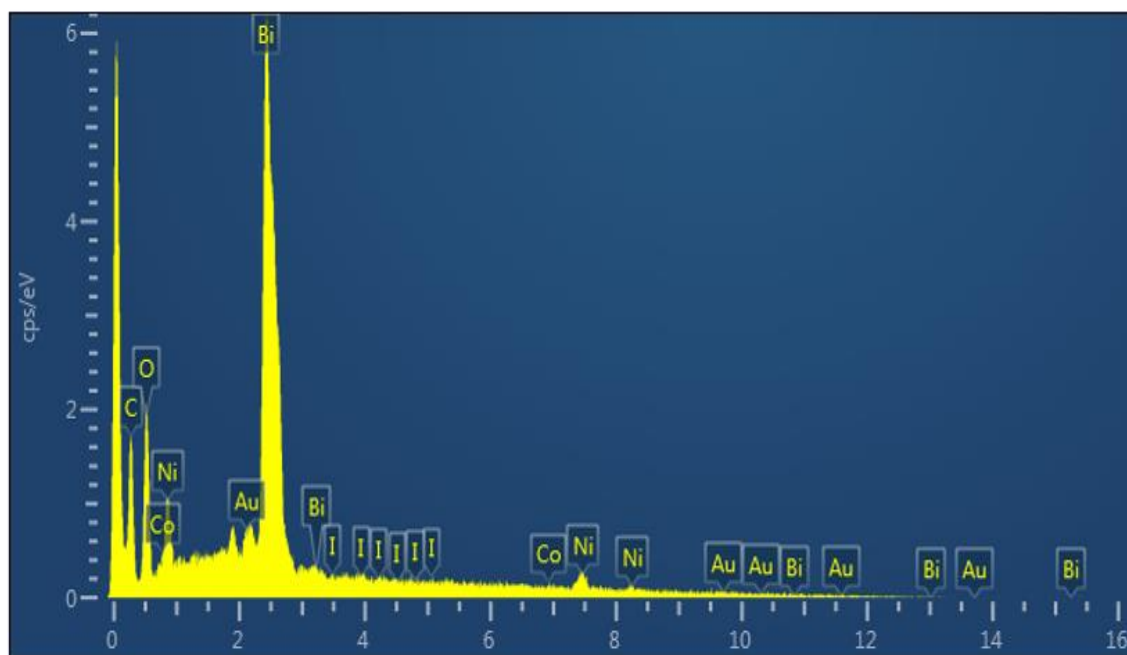

Figure S4. EDX spectra of Co/Ni-MOF@BiOI-10

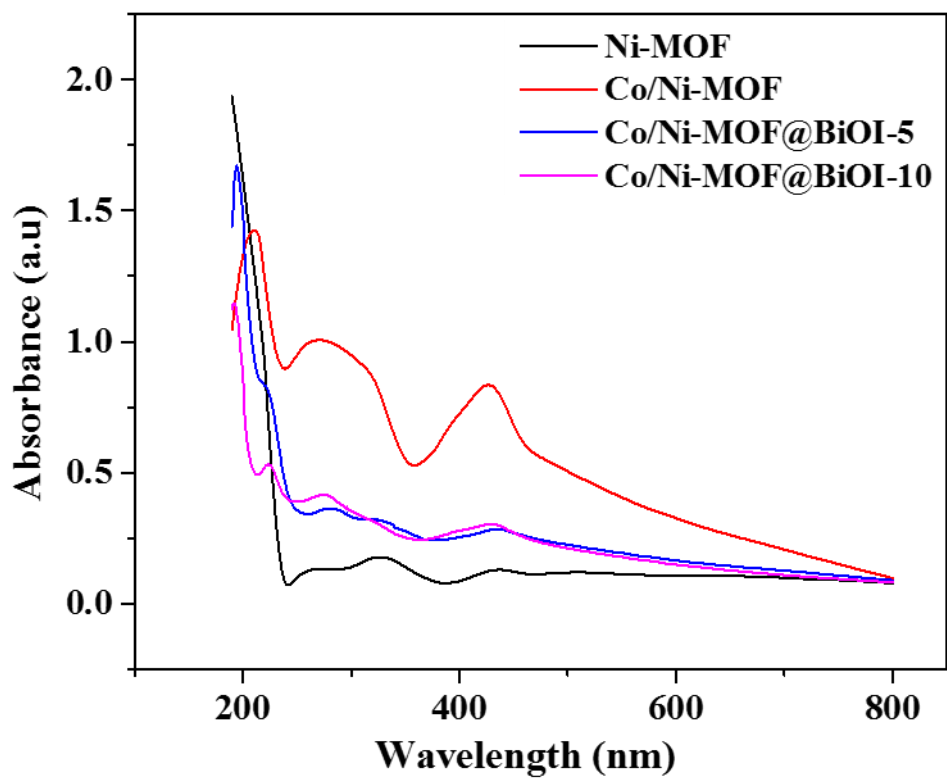

Figure S5. UV-vis spectra of all the samples.

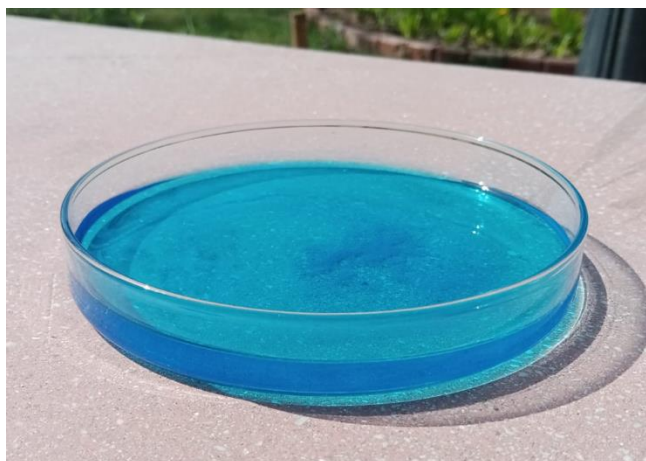

**Figure S6.** Irradiation of MB solution in sunlight. During irradiation, temperature was 35-38 °C, solar radiation intensity was 240 W/m<sup>2</sup>, and relative humidity was about 35 %.

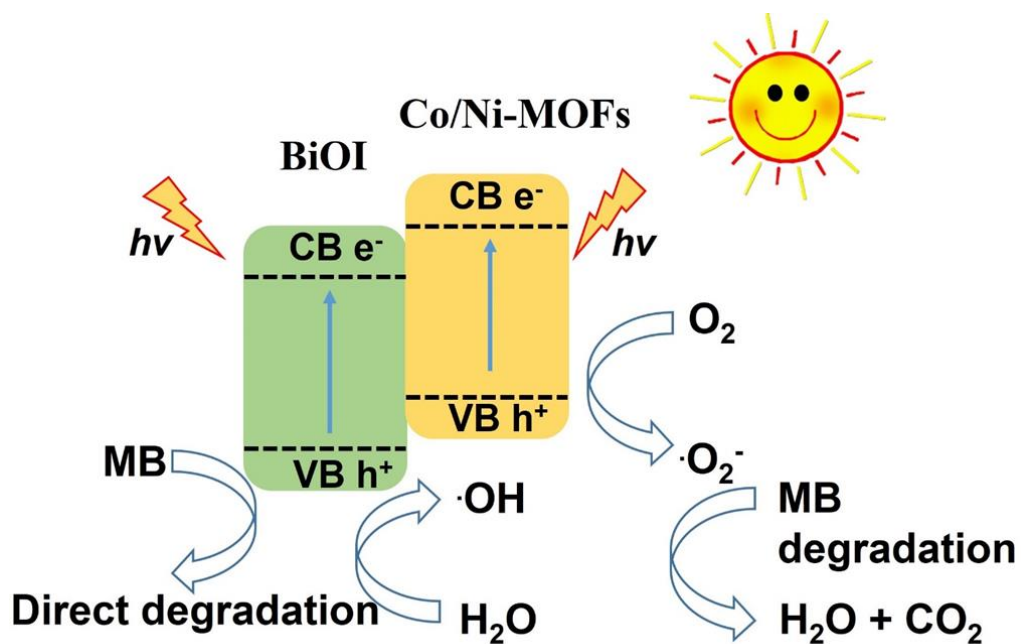

**Figure S7.** A schematic diagram of photocatalytic degradation of MB by Co/Ni-MOF@BiOI-10 under direct sunlight.
